# Supplementary material for: Clay-dye fluorescent hybrid material for the detection of neurotransmitter secretion from cells
Source: Royal Society of Chemistry journal article supplement (doi:10.1039/d5nr03358f), 2025-01-01
Supplement: d5nr03358f1.pdf [file d5nr03358f1.pdf]

## Supporting Information

# Clay-Dye Fluorescent Hybrid Material for the Detection of Neurotransmitter Secretion from Cells

*Giorgia Giovannini<sup>ab\*</sup>, Ada De Luigi<sup>a</sup>, Luciano F. Boesel<sup>b</sup>, Pierre Picchetti<sup>c\*</sup>, and  
Frank Biedermann<sup>c\*</sup>*

<sup>a</sup> Department of Biochemistry and Molecular Pharmacology, Mario Negri Institute for  
Pharmacological Research IRCCS, Via Mario Negri 2, Milano, Italy

<sup>b</sup> Empa, Swiss Federal Laboratories for Materials Science and Technology, Laboratory for  
Biomimetic Membranes and Textiles, Lerchenfeldstrasse 5, St. Gallen 9014, Switzerland

<sup>c</sup> Institute of Nanotechnology (INT) Karlsruhe Institute of Technology (KIT), Kaiserstrasse 12,  
76131 Karlsruhe, Germany

\*Correspondence should be directed to:

giorgia.giovannini@marionegri.it, pierre.picchetti@kit.edu and, frank.biedermann@kit.edu.

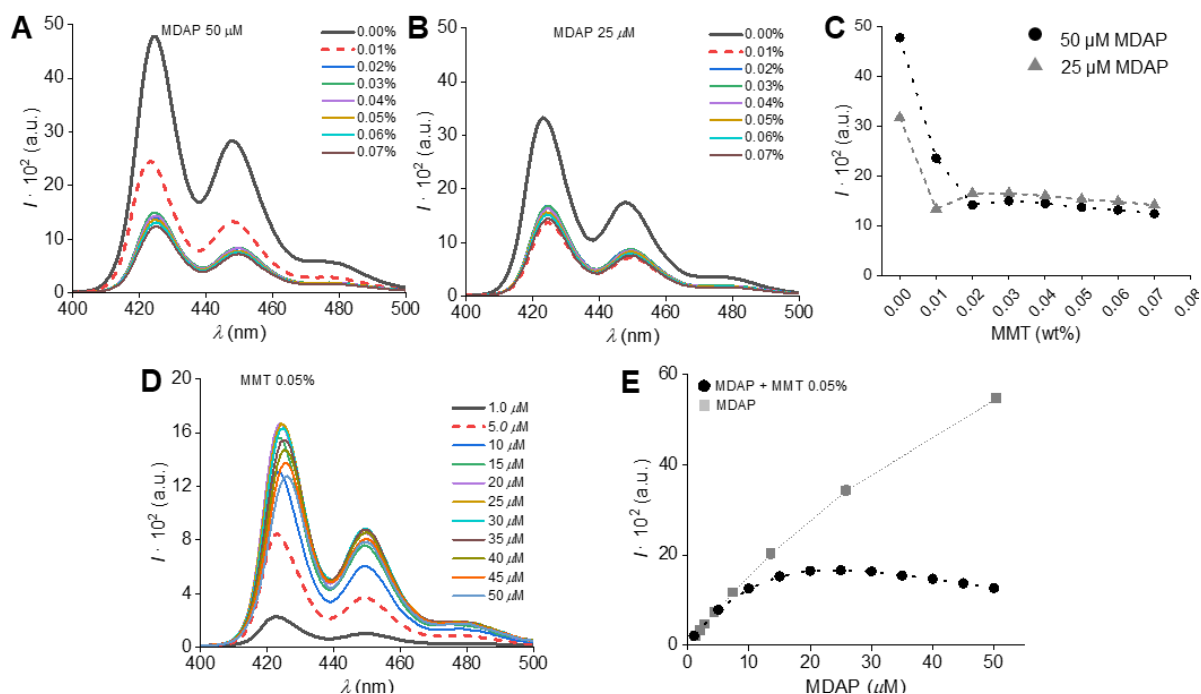

**Figure S1.** Titration of 50  $\mu\text{M}$  (A) and 25  $\mu\text{M}$  (B) MDAP with MMT at different concentrations (0-0.07 %). C) Comparison between the two MDAP concentrations, highlighting the saturation point of the quenching phenomenon. D) Titration of 0.05 % MMT with different concentrations of MDAP (0-50  $\mu\text{M}$ ). The quenching effect was visible at 10  $\mu\text{M}$  of MDAP, reaching a maximum at 50  $\mu\text{M}$  (E).

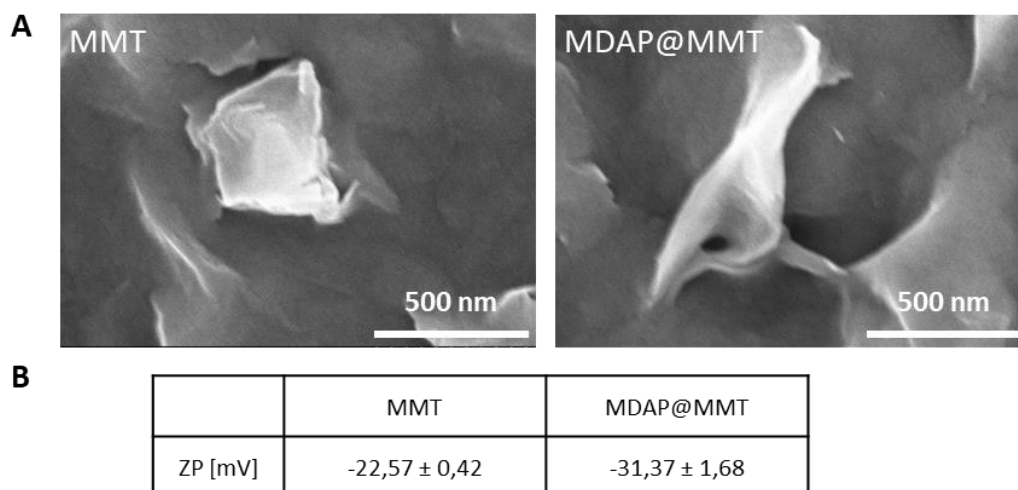

**Figure S2.** A) Morphological characterization of pristine MMT and MDAP@MMT (50  $\mu$ M MDAP to 0.05% MMT) via SEM indicating that the particles maintain their typical layered structure. B) Zeta potential measured for pristine MMT (0.05 %) and of the final probe MDAP@MMT (50  $\mu$ M and 0.05 % respectively) showing a slight decrease of MMT's surface charge upon MDAP adsorption. Data represent mean values  $\pm$  standard deviation ( $n = 3$ ).

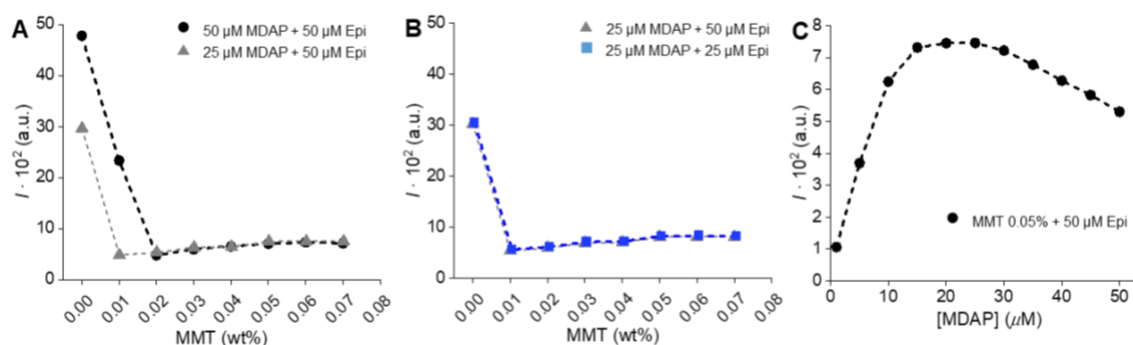

**Figure S3.** Evaluation of sensor performance by varying the MDAP/MMT ratio. Panels A–C demonstrate that the MDAP concentration primarily governs the saturation behavior of the sensor.

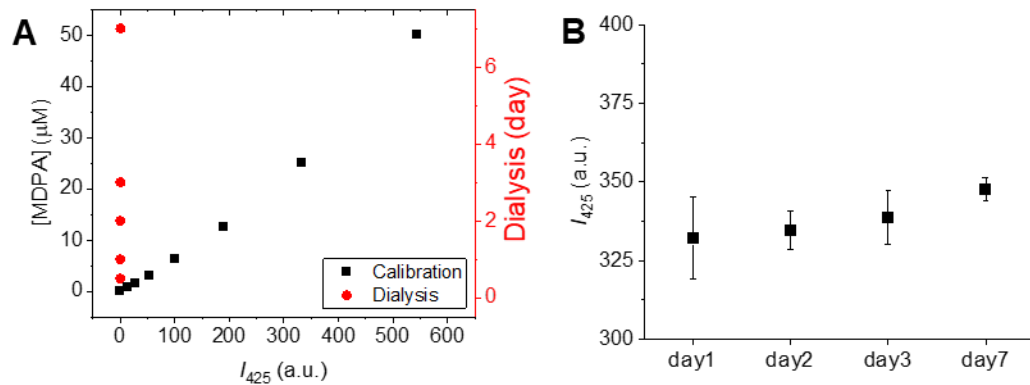

**Figure S4.** A) After 7 days of dialysis, no traces of MDAP were detected in the solution (red dots) as quantified with the calibration curve of MDAP (black squares). B) The signal of the MDAP@MMT remain stable during the 7-days dialysis. Values are reported as average values ( $n=3$ ),  $\pm$  sd.

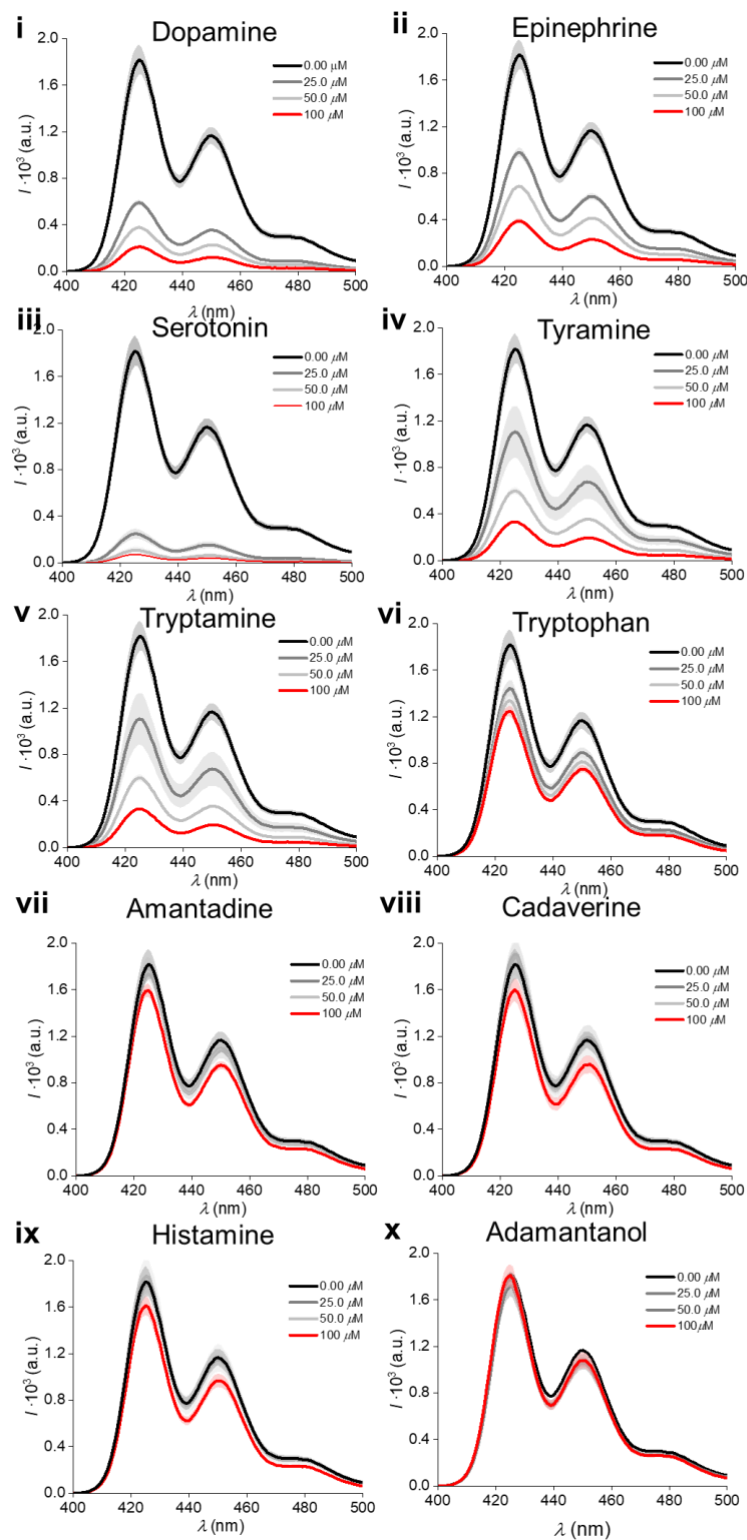

**Figure S5.** Attenuation of MDAP@MMT fluorescence upon addition of selected neurotransmitters, biosynthetic precursors, and other neuroactive metabolites.

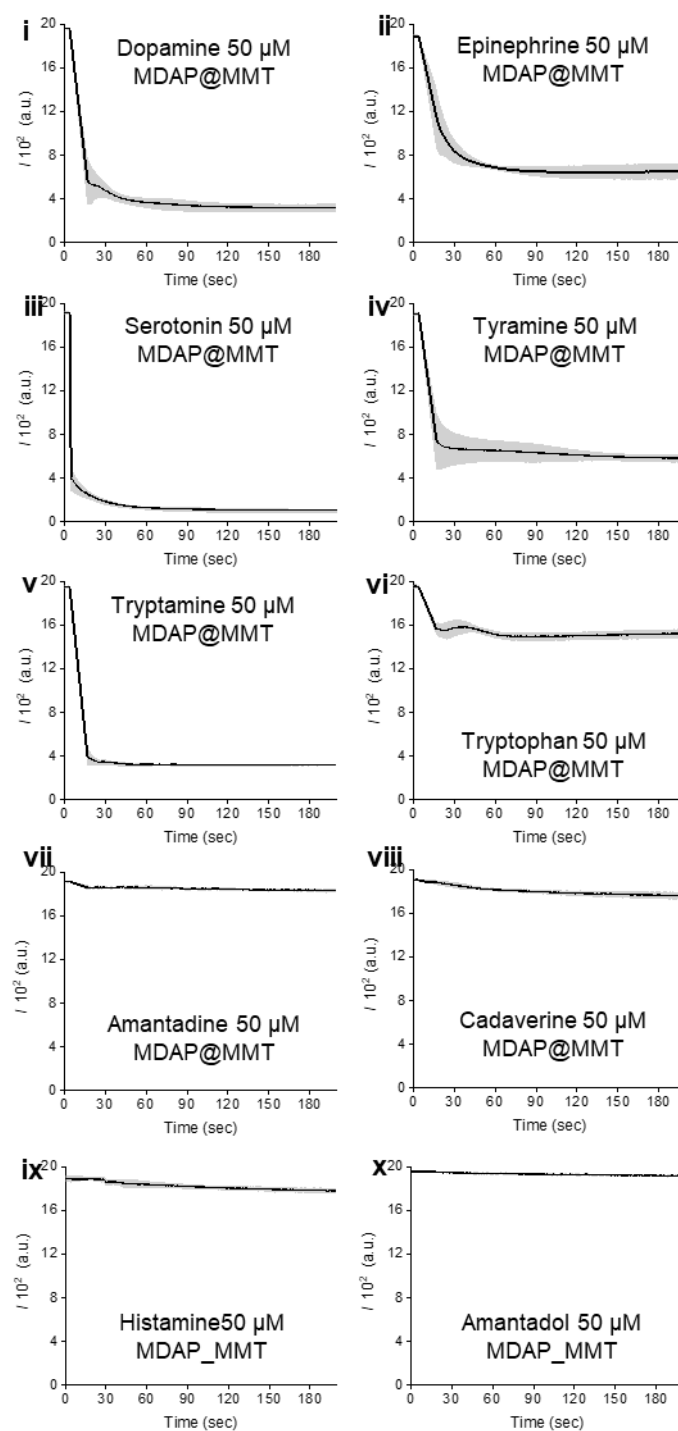

**Figure S6.** Rapid quenching kinetics of the MDAP@MMT probe upon analyte addition: equilibrium fluorescence is reached within 60 s.

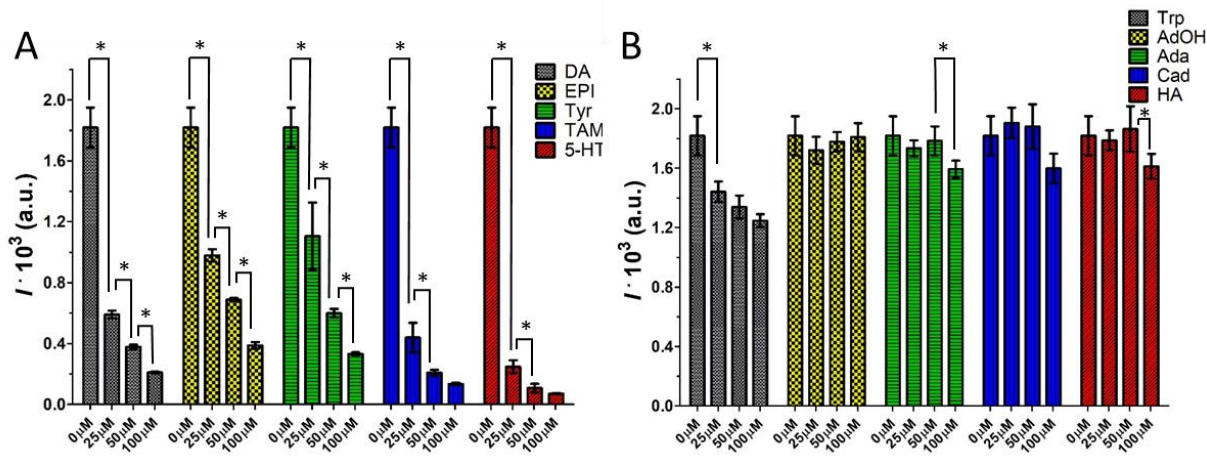

**Figure S7:** Statistical analysis of responsiveness of MDAP@MMT for different NTs. Data are reported as mean  $\pm$  sd ( $n = 3$ ). \* Sample means are statistically different (ANOVA One-way,  $n = 3$ ,  $\alpha 0.05$ , post hoc Tukey's test).

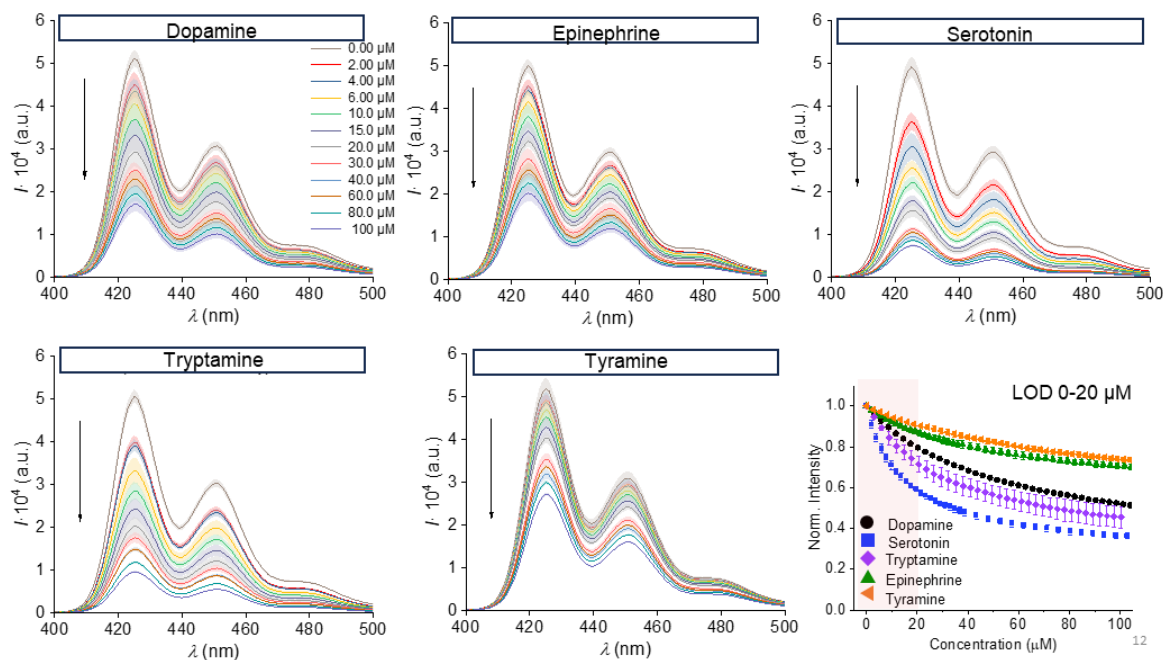

**Figure S8.** Analytical performance of MDAP@MMT toward catecholamine-type NTs. Limits of detection ( $\mu\text{M}$ ): dopamine 11.0, serotonin 2.80, epinephrine 31.0, L-tryptamine 8.35, L-tyramine 19.2.

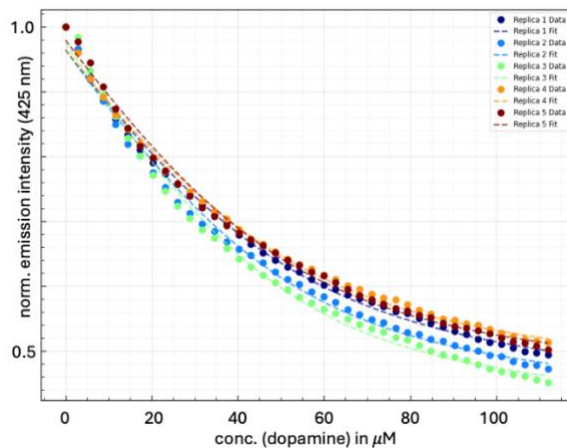

**Figure S9:** Dopamine titration of MDAP@MMT (0.05 wt % MMT, 50  $\mu$ M MDAP, 25 °. Normalized emission at 425 nm vs DA concentration for five automated replicas (symbols) and their 1:1 fits (lines). A 1:1 direct-binding model (DBA) was fitted to five independent titrations. For each replicate the parameters  $K_a$ ,  $I_0$ ,  $I(\text{MDAP@MMT})$  and  $I(\text{DA}\cdot\text{MDAP})\text{@MMT}$  were optimized with RMSE and  $R^2$ . The average fit result is  $K_a = (8.3 \pm 1.1) \times 10^4 \text{ M}^{-1}$ . These values confirm a high-affinity 1:1 interaction between dopamine and the MDAP·MMT suspension in aqueous media.



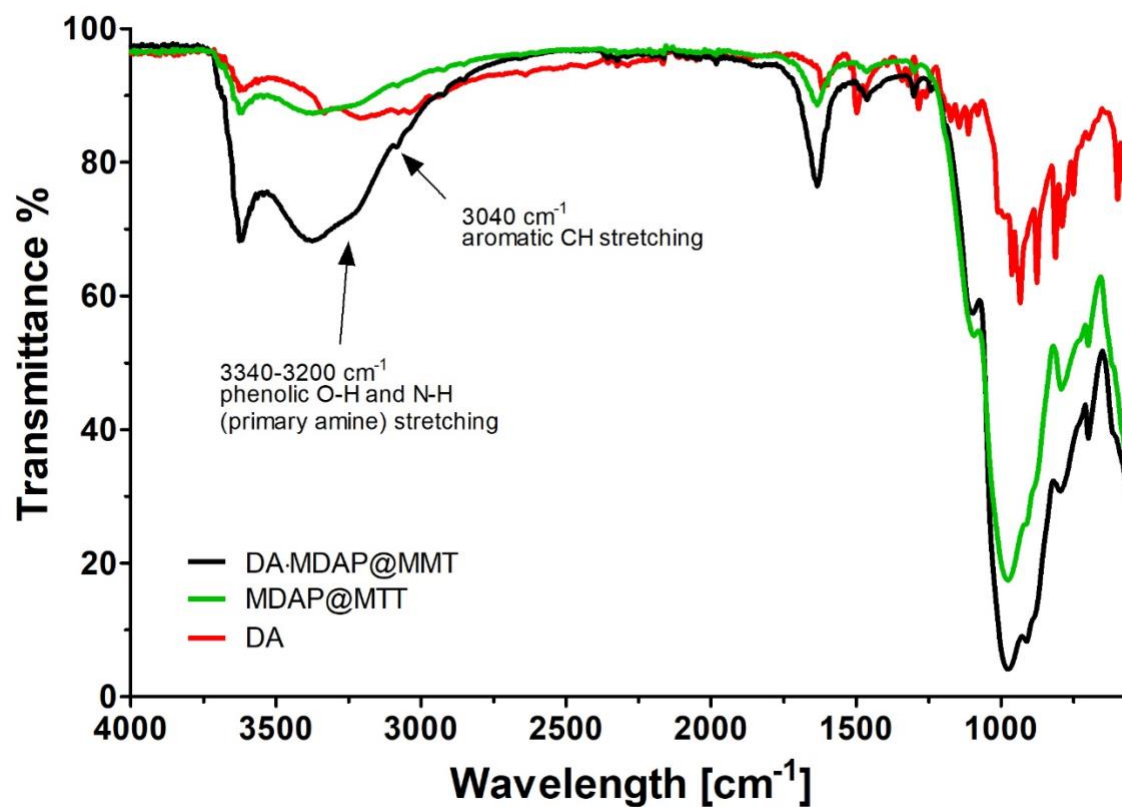

**Figure S10:** Figure S 8: FT-IT analysis confirming the adsorption of NTs on the probe. After treatment with 100  $\mu\text{M}$  of DA, the powder isolated by centrifugation and dried showed the peaks typically assigned to the N-H, O-H, and C-H stretching of DA, which are not present in the spectra of MDAP@MMT.

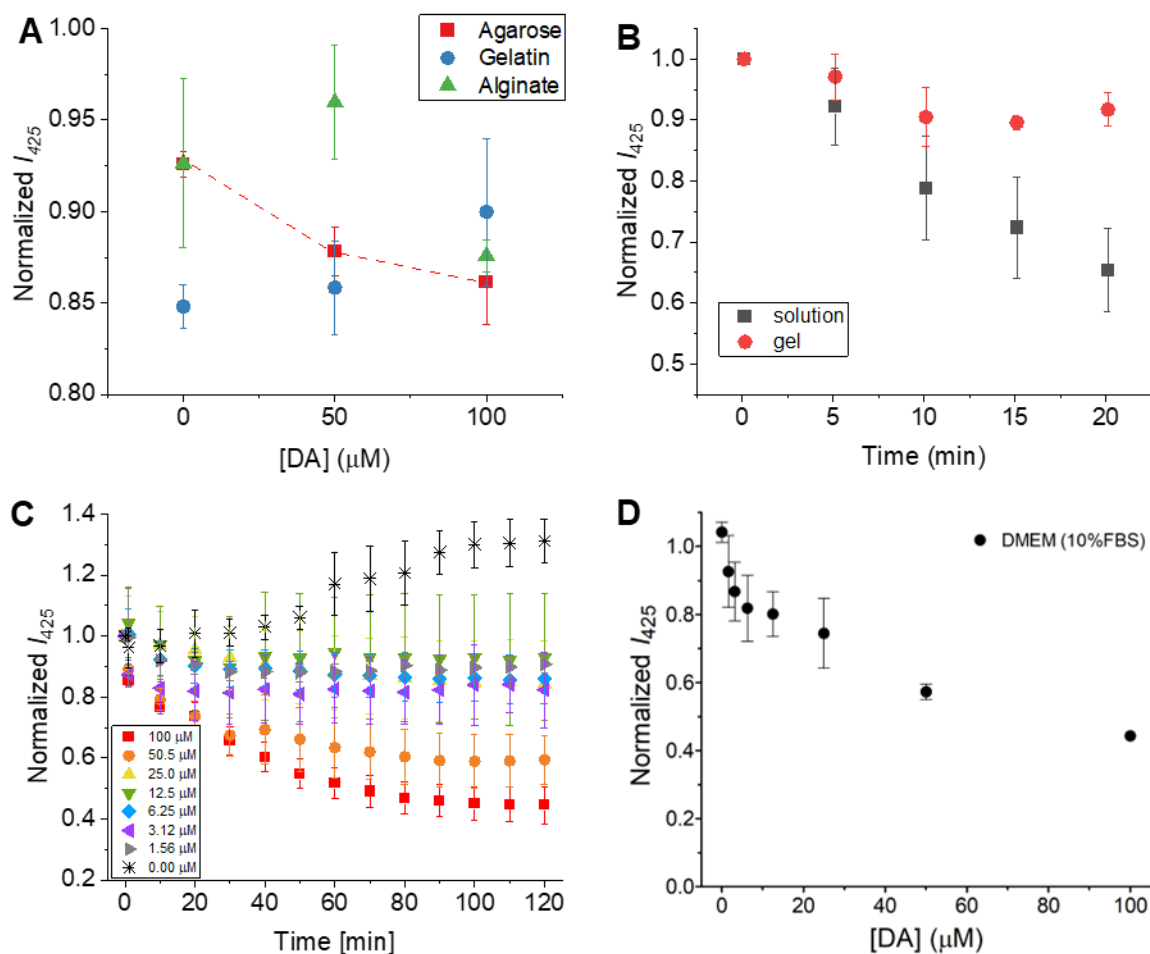

**Figure S11.** A) Sensing activity of MDAP@MMT in the presence of protein is retained only when the probe is immobilized in agarose hydrogel. B) Signal stability over time of free MDAP@MMT (black squares) compared to agarose-embedded MDAP@MMT (red circles) in cell culture medium (DMEM) supplemented with 10% fetal bovine serum (FBS). C) Fluorescence response of agarose-embedded MDAP@MMT to increasing concentrations of dopamine, in DMEM + 10% FBS. D) Responsiveness of agarose-embedded MDAP@MMT toward dopamine (0-100  $\mu\text{M}$ ) in DMEM + 10% FBS (no phenol red). Data are plotted as mean  $\pm$  standard deviation ( $n = 3$ ).

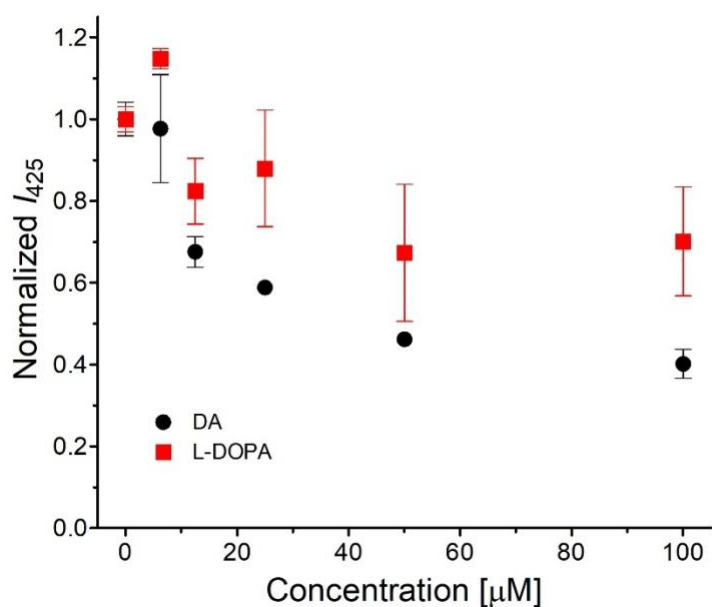

**Figure S12:** Comparison of the MDAP@MMT's signal variation when treated with DA or L-DOPA. The unstable adsorption of L-DOPA that could explain the fluctuation of signal intensity was attributed to its zwitterionic form.

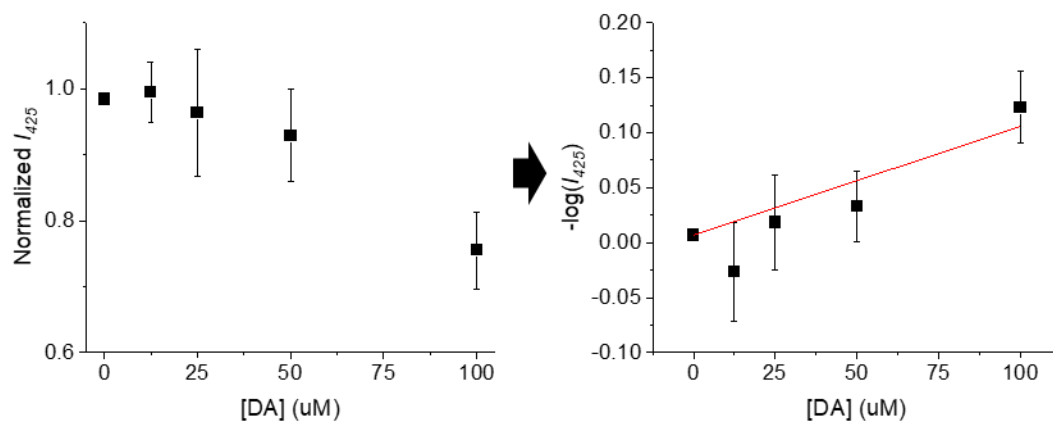

**Figure S13.** Calibration curve for DA in HBSS ( $R^2 = 0.86$ , slope = 1.4) employed for quantifying dopamine release from dopaminergic cells after CU treatment. Values are mean  $\pm$  SD ( $n = 3$ ).

**Table S1:** Summary of representative DA detection systems, highlighting their key features and corresponding limits of detection (LOD).

| <b>System</b>                                                           | <b>LOD (for DA)</b>                  | <b>Sensing Conditions</b>                                                  | <b>Key Materials / Probes</b>                                                             | <b>Reference</b>                   |
|-------------------------------------------------------------------------|--------------------------------------|----------------------------------------------------------------------------|-------------------------------------------------------------------------------------------|------------------------------------|
| <i>Aptamer-functionalized graphene FET (electrochemical transistor)</i> | 1 aM ( $10^{-18}$ M)                 | Artificial cerebrospinal fluid (aCSF); DA-spiked brain homogenate; pH ~7.4 | Graphene multitransistor array functionalized with dopamine-binding aptamer               | Abrantes M. et al. <sup>1</sup>    |
| <i>DNA-origami SERS sensor (plasmonic nanostar dimer)</i>               | 0.225 fM ( $2.25 \times 10^{-16}$ M) | Aqueous buffer; dried on SERS substrate                                    | DNA origami-templated Au@Ag nanostar dimers                                               | Kaur V. et al. <sup>2</sup>        |
| <i>Spread-spectrum SERS (label-free)</i>                                | 1.9 aM ( $1.9 \times 10^{-18}$ M)    | Saline solution (0.9% NaCl)                                                | Au nanoisland SERS substrate with spread-spectrum excitation                              | Lee W. et al. <sup>3</sup>         |
| <i>Fluorescent Au nanocluster (turn-off)</i>                            | 0.62 nM (PBS) / 0.83 nM (CSF)        | PBS buffer (0.5 mM, pH 7.2) and spiked human CSF                           | BSA-stabilized Au nanoclusters                                                            | Govindaraju S. et al. <sup>4</sup> |
| <i>Fluorescent carbon dots (boronic acid functionalized, turn-on)</i>   | 0.1 pM ( $1 \times 10^{-13}$ M)      | Aqueous buffer, neutral pH                                                 | B–N co-doped carbon dots with boronic acid and amine groups                               | Liu X. et al. <sup>5</sup>         |
| <i>Fluorescent polydopamine nanoparticles (turn-on)</i>                 | 40 nM                                | Alkaline solution (Tris/NaOH), pH > 8                                      | Dopamine self-polymerization to polydopamine nanoparticles                                | Yildirim A. et al. <sup>6</sup>    |
| <i>Fluorescent carbon dot probe (in situ synthesis)</i>                 | 56.2 nM                              | Mild aqueous conditions (37 °C); tested in human serum                     | In situ formation of green fluorescent carbon dots from dopamine and aminosilane (AEATMS) | Tang X. et al. <sup>7</sup>        |
| <i>Colorimetric Au nanoparticle assay</i>                               | 2 nM                                 | Aqueous buffer; tested in artificial CSF                                   | DSP-modified Au nanoparticles with Fe <sup>3+</sup> crosslinking of catechol groups       | Liu L. et al. <sup>8</sup>         |

## References

1. Abrantes, M. *et al.* Ultrasensitive dopamine detection with graphene aptasensor multitransistor arrays. *J. Nanobiotechnology* 20, 495 (2022).
2. Kaur, V., Sharma, M. & Sen, T. DNA Origami-Templated Bimetallic Nanostar Assemblies for Ultra-Sensitive Detection of Dopamine. *Front. Chem.* 9, (2021).
3. Lee, W. *et al.* Spread spectrum SERS allows label-free detection of attomolar neurotransmitters. *Nat. Commun.* 12, 159 (2021).
4. Govindaraju, S., Ankireddy, S. R., Viswanath, B., Kim, J. & Yun, K. Fluorescent Gold Nanoclusters for Selective Detection of Dopamine in Cerebrospinal fluid. *Sci. Rep.* 7, 40298 (2017).
5. Liu, X. *et al.* In situ bifunctionalized carbon dots with boronic acid and amino groups for ultrasensitive dopamine detection. *Anal. Methods* 8, 3236–3241 (2016).
6. Yildirim, A. & Bayindir, M. Turn-on Fluorescent Dopamine Sensing Based on *in Situ* Formation of Visible Light Emitting Polydopamine Nanoparticles. *Anal. Chem.* 86, 5508–5512 (2014).
7. Tang, X.-Y. *et al.* Turn-on fluorescent probe for dopamine detection in solutions and live cells based on in situ formation of aminosilane-functionalized carbon dots. *Anal. Chim. Acta* 1157, 338394 (2021).
8. Liu, L., Li, S., Liu, L., Deng, D. & Xia, N. Simple, sensitive and selective detection of dopamine using dithiobis(succinimidylpropionate)-modified gold nanoparticles as colorimetric probes. *Analyst* 137, 3794 (2012).
